# Supplementary material
Source: PubMed Central journal article supplement (PMC7361357)
Supplement: ANAE-76-134-s001.pdf [file ANAE-76-134-s001.pdf]

# Usability of PPE for Covid-19

---

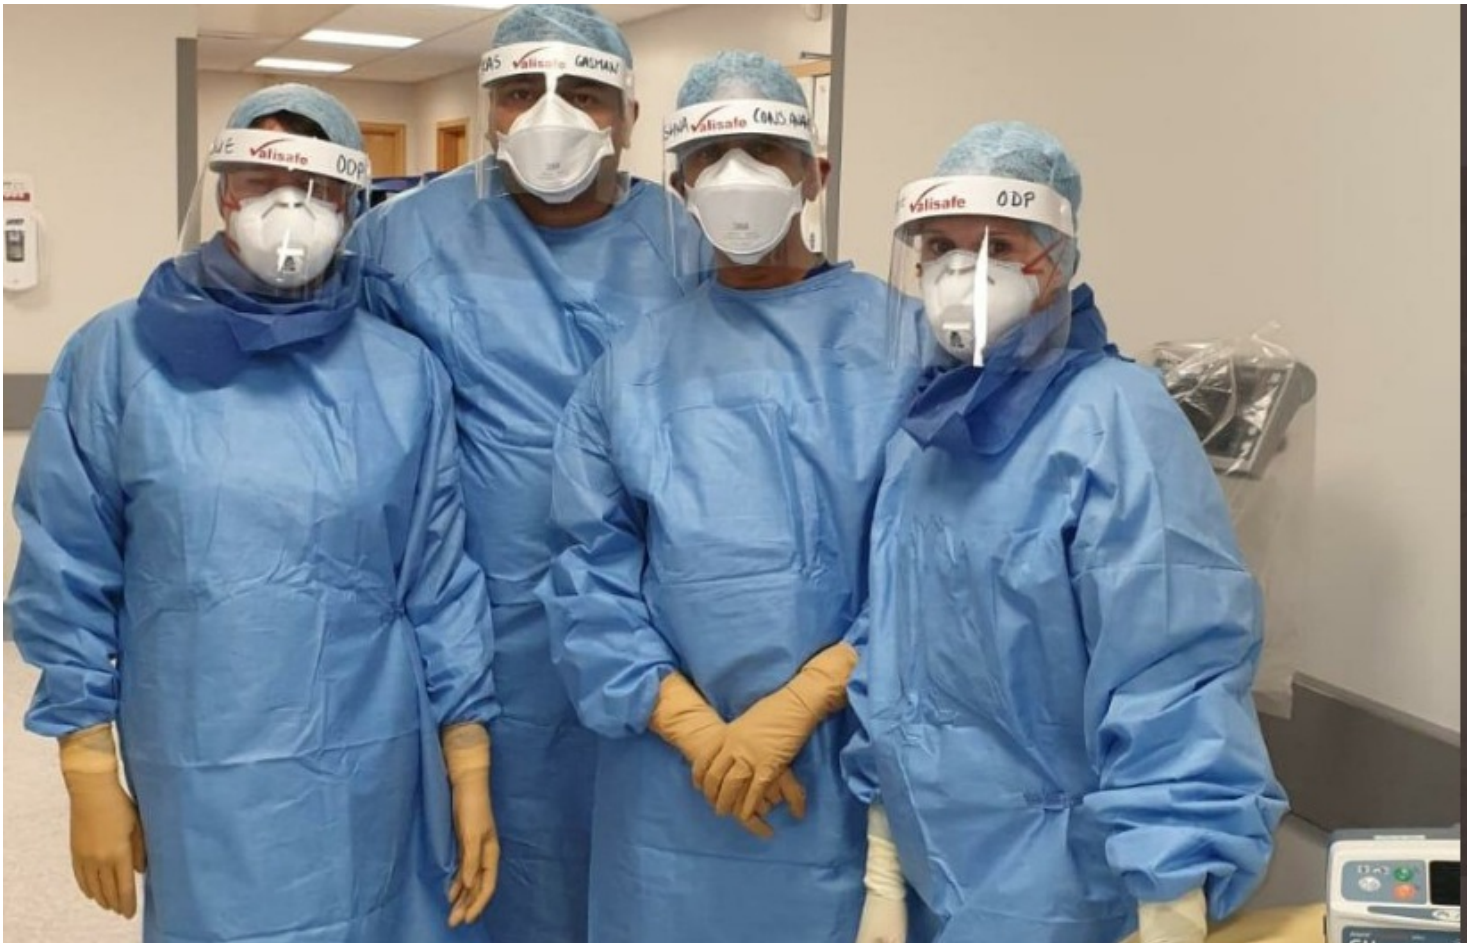

## ***We want to know what you think about Personal Protective Equipment (PPE) usability during the Covid-19 pandemic***

Prof. Jay Banerjee is a Consultant in Geriatric Emergency Medicine in the East Midlands. He is finding that working in PPE for Covid-19 for a 12 hour shift is changing the way he works and wonders if this is also a problem for other people. He is collaborating with Prof. Sue Hignett, a Chartered Ergonomist & Human Factors Specialist (C.ErgHF).

The survey will take approx. 5 minutes to complete (*this survey is **not** about PPE provision and availability*). All data will be anonymous and only reported in summary tables or anonymised quotes.

Your answers will be used to gain a preliminary understanding of the use of PPE for prolonged working and to design a future observational/interview study when appropriate.

If there are any questions that you feel are not relevant to you, or you would prefer not to answer, this is fine; just move to the next one.

Thank you very much for your participation

Jay and Sue

Prof. Jay Banerjee is a Consultant in Geriatric Emergency Medicine at University Hospitals of Leicester NHS Trust and Honorary Professor of Safety Science at Loughborough University.

Prof. Sue Hignett is a Chartered Human Factor Specialist and Professor of Healthcare Ergonomics & Patient Safety at Loughborough University.

I consent to participate in this survey and for my answers to be used as outlined above \* *Required*

- Yes
- No

I am using PPE \* *Required*

- Yes
- No

## Section 1. About your work

Where are you working \* *Required*

- Emergency Department (A&E)
- ICU
- High Dependency
- Covid medical ward
- Non-Covid medical wards
- Other (non-medical) wards
- Diagnostic services
- Rehabilitation services
- Other

Do you know what PPE you should be wearing in your area \* *Required*

- Yes
- Most of the time
- I get confused sometimes
- It is unclear in different areas
- No

## Face Cover PPE (masks/glasses/visors)

How well does your face cover PPE fit (including adjustment to fit). Answer all PPE items that apply to you

[+ More info](#)

Please don't select more than 1 answer(s) per row.

|                                    | Excellent fit            | Acceptable fit           | Poor fit                 |
|------------------------------------|--------------------------|--------------------------|--------------------------|
| Safety glasses                     | <input type="checkbox"/> | <input type="checkbox"/> | <input type="checkbox"/> |
| Safety glasses over spectacles     | <input type="checkbox"/> | <input type="checkbox"/> | <input type="checkbox"/> |
| Safety goggles                     | <input type="checkbox"/> | <input type="checkbox"/> | <input type="checkbox"/> |
| Surgical mask                      | <input type="checkbox"/> | <input type="checkbox"/> | <input type="checkbox"/> |
| Surgical hood with ties            | <input type="checkbox"/> | <input type="checkbox"/> | <input type="checkbox"/> |
| FFP3 face mask                     | <input type="checkbox"/> | <input type="checkbox"/> | <input type="checkbox"/> |
| Full face shield (visor)           | <input type="checkbox"/> | <input type="checkbox"/> | <input type="checkbox"/> |
| Respirator (within gas tight suit) | <input type="checkbox"/> | <input type="checkbox"/> | <input type="checkbox"/> |

Does your face cover PPE hurt or irritate your skin/ ears/ nose/ mouth/ etc.? Answer all PPE items that apply to you

[+ More info](#)

Please don't select more than 1 answer(s) per row.

|                                | Not comfortable at all   | Comfortable for up to 2 hours | Comfortable for up to 4 hours | Comfortable for up to 8 hours | Comfortable for the whole shift (up to 12 hours) | I am moving/adjusting it all the time |
|--------------------------------|--------------------------|-------------------------------|-------------------------------|-------------------------------|--------------------------------------------------|---------------------------------------|
| Safety glasses                 | <input type="checkbox"/> | <input type="checkbox"/>      | <input type="checkbox"/>      | <input type="checkbox"/>      | <input type="checkbox"/>                         | <input type="checkbox"/>              |
| Safety glasses over spectacles | <input type="checkbox"/> | <input type="checkbox"/>      | <input type="checkbox"/>      | <input type="checkbox"/>      | <input type="checkbox"/>                         | <input type="checkbox"/>              |
| Safety goggles                 | <input type="checkbox"/> | <input type="checkbox"/>      | <input type="checkbox"/>      | <input type="checkbox"/>      | <input type="checkbox"/>                         | <input type="checkbox"/>              |
| Surgical mask                  | <input type="checkbox"/> | <input type="checkbox"/>      | <input type="checkbox"/>      | <input type="checkbox"/>      | <input type="checkbox"/>                         | <input type="checkbox"/>              |

|                          |                          |                          |                          |                          |                          |                          |
|--------------------------|--------------------------|--------------------------|--------------------------|--------------------------|--------------------------|--------------------------|
| Surgical hood with ties  | <input type="checkbox"/> |
| FFP3 face mask           | <input type="checkbox"/> |
| Full face shield (visor) | <input type="checkbox"/> |

Can you see to read and operate equipment? Answer all PPE items that apply to you

Please don't select more than 2 answer(s) per row.

|                                    | Yes, no change with PPE  | It's harder but ok       | Difficult due to glasses/mask/visor | Difficult due to sweating/misting |
|------------------------------------|--------------------------|--------------------------|-------------------------------------|-----------------------------------|
| Safety glasses                     | <input type="checkbox"/> | <input type="checkbox"/> | <input type="checkbox"/>            | <input type="checkbox"/>          |
| Safety glasses over spectacles     | <input type="checkbox"/> | <input type="checkbox"/> | <input type="checkbox"/>            | <input type="checkbox"/>          |
| Safety goggles                     | <input type="checkbox"/> | <input type="checkbox"/> | <input type="checkbox"/>            | <input type="checkbox"/>          |
| Surgical mask                      | <input type="checkbox"/> | <input type="checkbox"/> | <input type="checkbox"/>            | <input type="checkbox"/>          |
| Surgical hood with ties            | <input type="checkbox"/> | <input type="checkbox"/> | <input type="checkbox"/>            | <input type="checkbox"/>          |
| FFP3 face mask                     | <input type="checkbox"/> | <input type="checkbox"/> | <input type="checkbox"/>            | <input type="checkbox"/>          |
| Full face shield (visor)           | <input type="checkbox"/> | <input type="checkbox"/> | <input type="checkbox"/>            | <input type="checkbox"/>          |
| Respirator (within gas tight suit) | <input type="checkbox"/> | <input type="checkbox"/> | <input type="checkbox"/>            | <input type="checkbox"/>          |

Can you see to communicate and hear colleagues, alarms etc. whilst wearing PPE? Answer all PPE items that apply to you

Please don't select more than 1 answer(s) per row.

|                                    | Yes, no change with PPE  | It's harder but ok       | Difficult due to mask/visor |
|------------------------------------|--------------------------|--------------------------|-----------------------------|
| Surgical mask                      | <input type="checkbox"/> | <input type="checkbox"/> | <input type="checkbox"/>    |
| Surgical hood with ties            | <input type="checkbox"/> | <input type="checkbox"/> | <input type="checkbox"/>    |
| FFP3 face mask                     | <input type="checkbox"/> | <input type="checkbox"/> | <input type="checkbox"/>    |
| Full face shield (visor)           | <input type="checkbox"/> | <input type="checkbox"/> | <input type="checkbox"/>    |
| Respirator (within gas tight suit) | <input type="checkbox"/> | <input type="checkbox"/> | <input type="checkbox"/>    |

Do you have any comments to add?

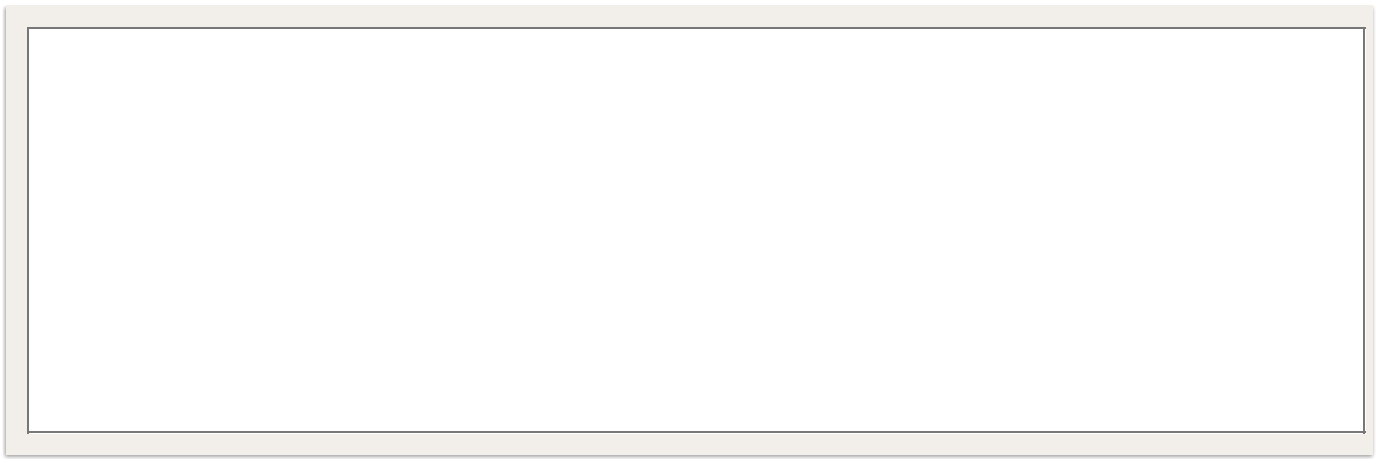

## Body Cover PPE (aprons/gowns)

How well does your body cover PPE fit (including adjustment to fit). Answer all PPE items that apply to you

Please don't select more than 1 answer(s) per row.

|                                         | Excellent fit            | Acceptable fit           | Poor fit                 |
|-----------------------------------------|--------------------------|--------------------------|--------------------------|
| Plastic apron                           | <input type="checkbox"/> | <input type="checkbox"/> | <input type="checkbox"/> |
| Surgical gown without sleeves           | <input type="checkbox"/> | <input type="checkbox"/> | <input type="checkbox"/> |
| Surgical gown with sleeves              | <input type="checkbox"/> | <input type="checkbox"/> | <input type="checkbox"/> |
| One piece coverall (white paper onesie) | <input type="checkbox"/> | <input type="checkbox"/> | <input type="checkbox"/> |
| Gas tight suit (with respirator)        | <input type="checkbox"/> | <input type="checkbox"/> | <input type="checkbox"/> |

Can you reach and move to operate equipment? Answer all PPE items that apply to you

Please don't select more than 2 answer(s) per row.

|                                         | Yes, no change with PPE  | It's harder but ok       | Difficult due to fit     | Difficult due to sweating |
|-----------------------------------------|--------------------------|--------------------------|--------------------------|---------------------------|
| Plastic apron                           | <input type="checkbox"/> | <input type="checkbox"/> | <input type="checkbox"/> | <input type="checkbox"/>  |
| Surgical gown without sleeves           | <input type="checkbox"/> | <input type="checkbox"/> | <input type="checkbox"/> | <input type="checkbox"/>  |
| Surgical gown with sleeves              | <input type="checkbox"/> | <input type="checkbox"/> | <input type="checkbox"/> | <input type="checkbox"/>  |
| One piece coverall (white paper onesie) | <input type="checkbox"/> | <input type="checkbox"/> | <input type="checkbox"/> | <input type="checkbox"/>  |
| Gas tight suit (with respirator)        | <input type="checkbox"/> | <input type="checkbox"/> | <input type="checkbox"/> | <input type="checkbox"/>  |

Do you have any comments to add?



## Hand Cover PPE (gloves)

How well do your PPE gloves fit (adjust to fit)

Please don't select more than 1 answer(s) per row.

|                              | Excellent fit            | Acceptable fit           | Poor fit                 |
|------------------------------|--------------------------|--------------------------|--------------------------|
| Gloves disposable            | <input type="checkbox"/> | <input type="checkbox"/> | <input type="checkbox"/> |
| Gloves with viral protection | <input type="checkbox"/> | <input type="checkbox"/> | <input type="checkbox"/> |

Has your dexterity changed? Including using touch screens, pressing buttons, turning knobs, opening vials/taps, using syringes etc.

Please don't select more than 2 answer(s) per row.

|                              | Yes, no change with PPE  | It's harder but ok       | Difficult due to fit of gloves | Difficult due to sweating |
|------------------------------|--------------------------|--------------------------|--------------------------------|---------------------------|
| Gloves disposable            | <input type="checkbox"/> | <input type="checkbox"/> | <input type="checkbox"/>       | <input type="checkbox"/>  |
| Gloves with viral protection | <input type="checkbox"/> | <input type="checkbox"/> | <input type="checkbox"/>       | <input type="checkbox"/>  |

Do you have any comments to add?

## Monitoring Information

I identify as \* *Required*

Female

Male

Other

My height \* *Required*

Over 2 metres (6ft 7in)

1.83m - 1.98m (6ft - 6ft 6in)

1.70m - 1.80m (5ft 7in - 5ft 11in)

1.52m - 1.68m (5ft - 5ft 6ins)

Less than 1.50m (5ft)

**If you want more information about the survey, please contact:**

Jay Banerjee ([jb234@leicester.ac.uk](mailto:jb234@leicester.ac.uk))

Sue Hignett ([S.M.Hignett@lboro.ac.uk](mailto:S.M.Hignett@lboro.ac.uk))

/

Many thanks for your response

***Take care and keep well***

---
